# Supplementary material
Source: Springer Nature journal article supplement (https://www.springermedizin.de/resource/supplementary/12943_2013_1131_MOESM2_ESM.pdf/9552562)

# A CB1954

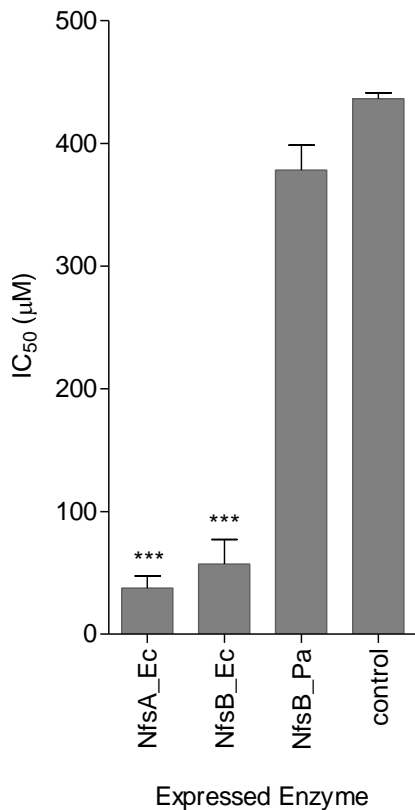

# B nitro-CBI-DEI

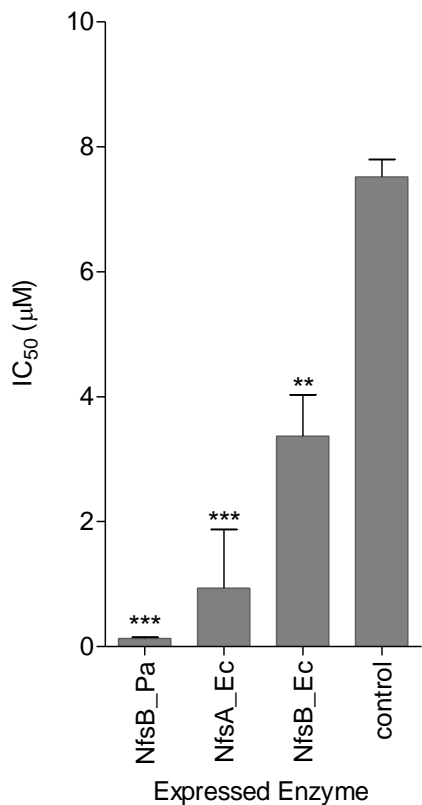

Supplement: MOESM2 [file 9552562]
